# Supplementary material for: In Vitro and In Vivo Antiviral Studies of New Heteroannulated 1,2,3-Triazole Glycosides Targeting the Neuraminidase of Influenza A Viruses
Source: MDPI journal article supplement (doi:10.3390/ph15030351), 2022-03-14
Supplement: s1 [file s1]

**Titration of NA activity for viruses by colorimetric Assay**

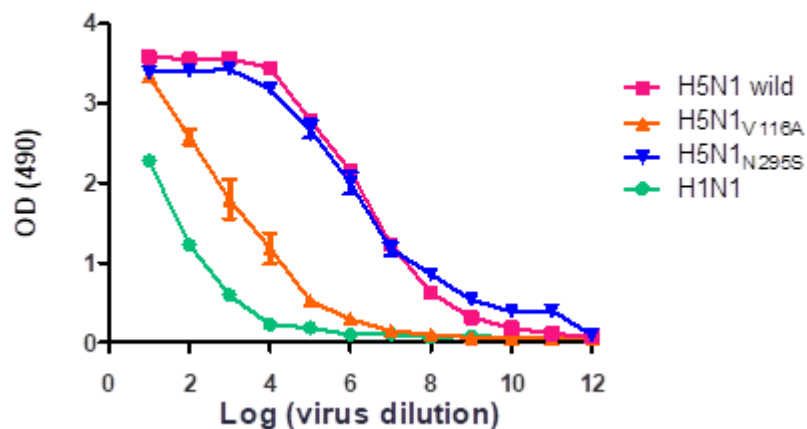

**Figure S1.** Titration of neuraminidase activity of H5N1<sub>wild</sub>, H5N1<sub>V116A</sub>, H5N1<sub>N295S</sub>, and H1N1 viruses.

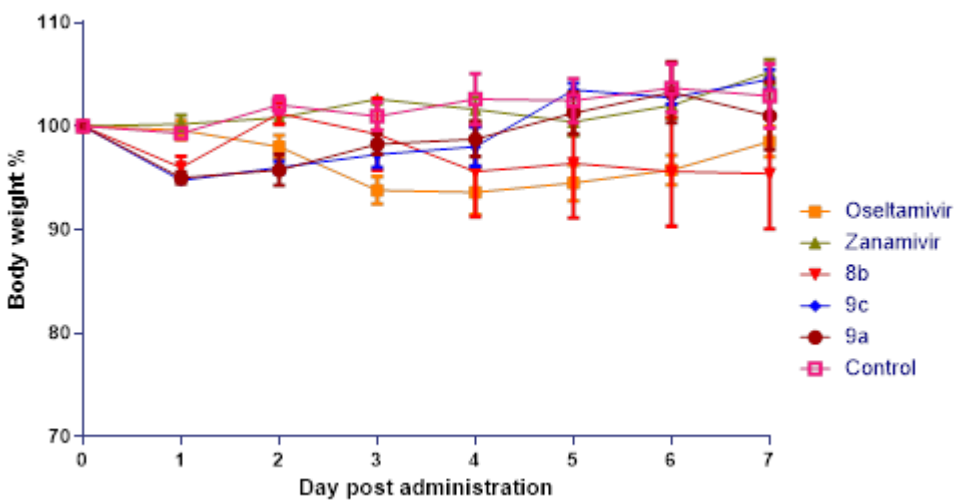

**Figure S2.** Safety of docked synthetic compounds (given as 3 doses), zanamivir, and oseltamivir compared with that of control (1X PBS). The safest compounds were **9c** and **9a**, which, like zanamivir, did not affect body weight. **Compound 8b**, like oseltamivir, had a slight effect on body weight.

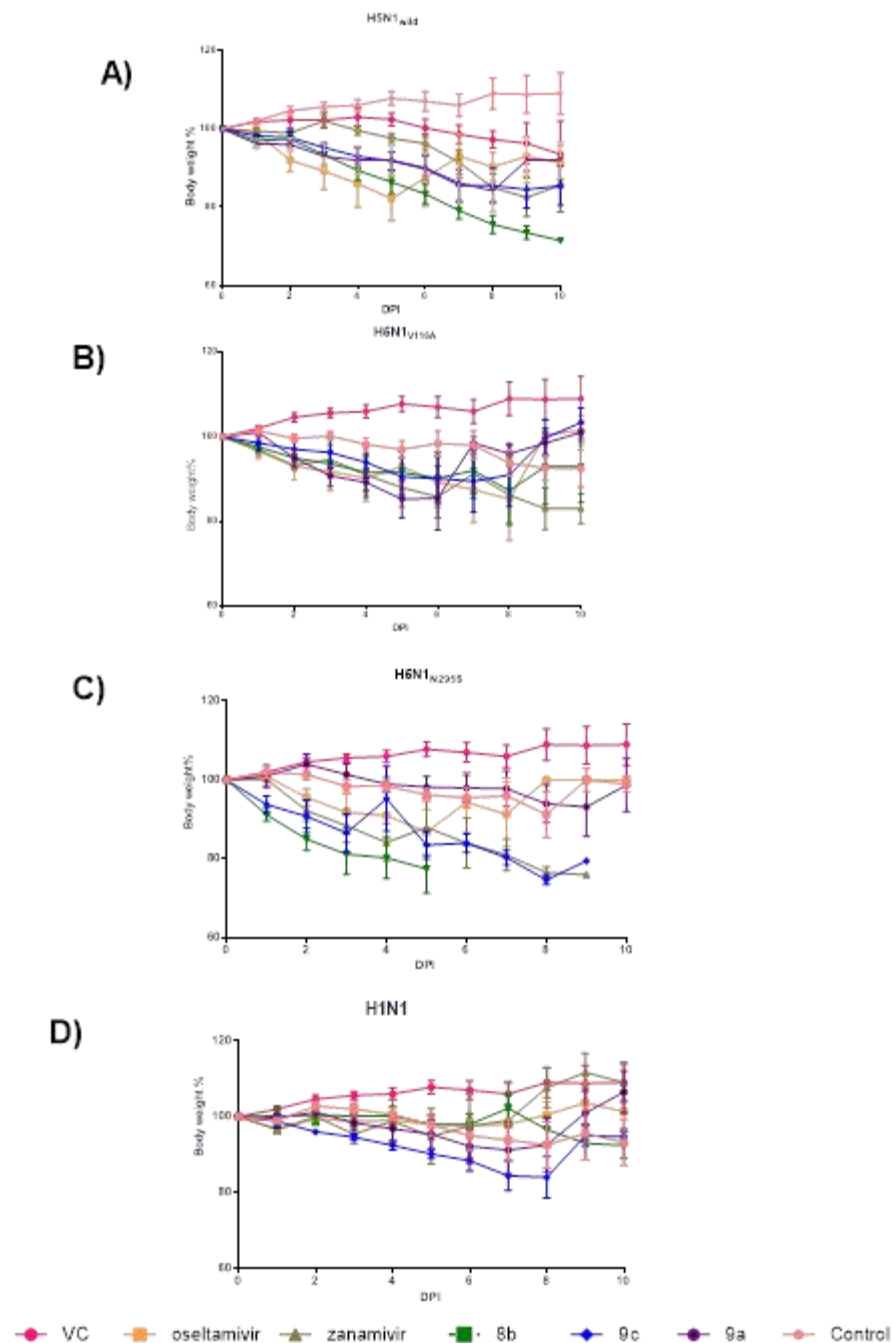

**Figure S3.** Body weight loss of mice infected with different viruses that were given either synthetic compounds **8b**, **9c**, and **9a** 5 h post infection, oseltamivir or zanamivir as drug control, or no treatment (viral control [VC]). All groups were compared with an uninfected control group that was given 1X PBS instead of drugs or compounds. (A) Antiviral activity after infection with H5N1<sub>wild</sub> (B) Antiviral activity after infection with H5N1<sub>V116A</sub> (C) Antiviral activity after infection with H5N1<sub>N295S</sub> (D) Efficacy and antiviral activity after infection with H1N1 virus.

Wae1AbdElHafeez-N53-CDC13-H1

Archive directory: /export/home/vmr1/vmrsys/data  
Sample directory: D05mm\_test\_12Mar2014-21:34:40  
File: PROTON

Pulse Sequence: s2pul

Solvent: CDC13

Temp. 30.0 C / 303.1 K

Mercury-300BS "NMR300"

Relax. delay 1.000 sec  
Pulse 12.0 degrees  
Acq. time 4.004 sec  
Width 6600.7 Hz  
150 repetitions  
OBSERVE H1, 300.0673634 MHz  
DATA PROCESSING  
Line broadening 0.9 Hz  
FT size 65536  
Total time 36 min, 56 sec  
Date: Nov 26 2017

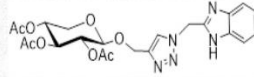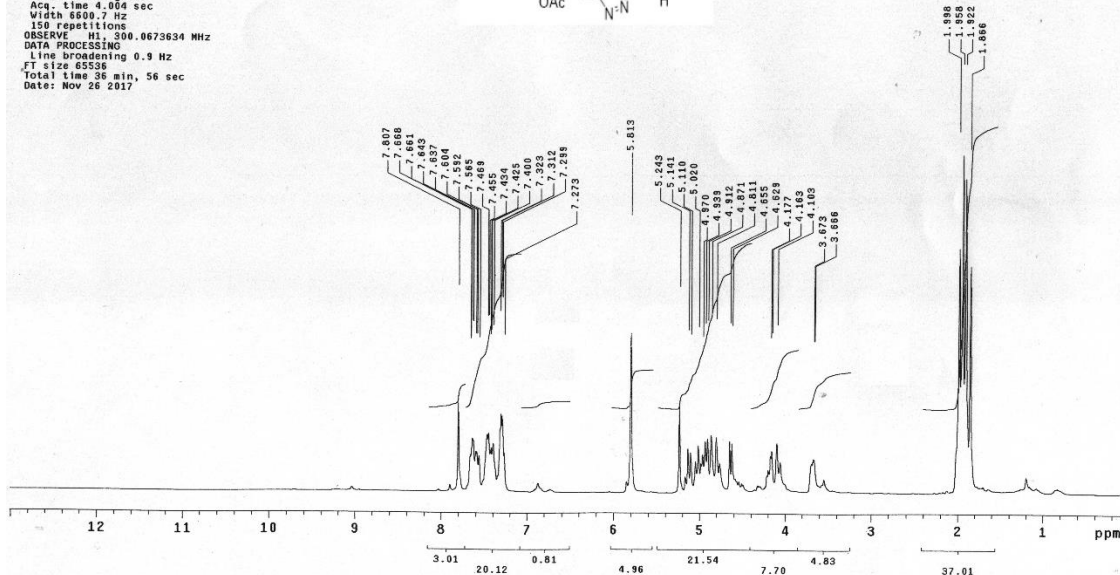

Wae1AbdElHafeez-551-CDC13-H1

Archive directory: /export/home/vmr1/vmrsys/data  
Sample directory: D05mm\_test\_12Mar2014-21:34:40  
File: PROTON

Pulse Sequence: s2pul

Solvent: CDC13

Temp. 30.0 C / 303.1 K

Mercury-300BS "NMR300"

Relax. delay 1.000 sec  
Pulse 12.0 degrees  
Acq. time 4.004 sec  
Width 6600.7 Hz  
24 repetitions  
OBSERVE H1, 300.0673634 MHz  
DATA PROCESSING  
Line broadening 0.9 Hz  
FT size 65536  
Total time 36 min, 56 sec  
Date: Nov 26 2017

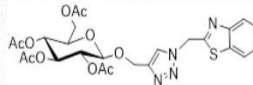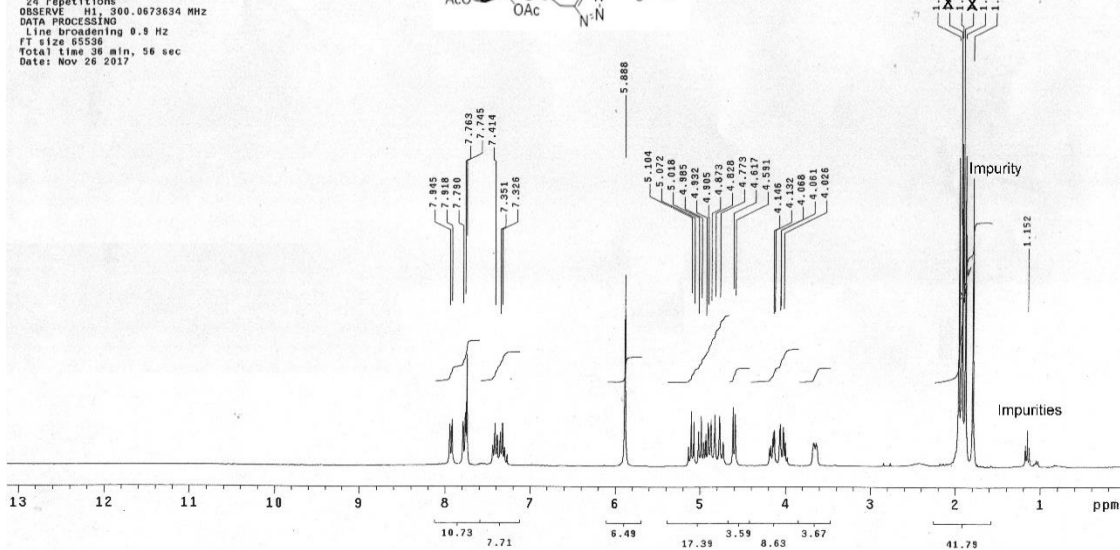

TarekSaad-SS1-CDC13-C13

Archive directory: /export/home/vnmr1/vnmrsys/data  
Sample directory: DD5mm\_test\_12Mar2014-21:34:40  
File: PROTON

Pulse Sequence: s2pul  
Solvent: CDC13  
Temp: 30.0 C / 303.1 K  
Mercury-300MS "NMR300"

Pulse 67.5 degrees  
Acq. time 1.767 sec  
Width 18761.7 Hz  
328 repetitions  
OBSERVE C13, 75.4520062 MHz  
DECOUPLE H1, 300.0688576 MHz  
Power 10 dB  
continuously on  
WALTZ-16 modulated  
DATA PROCESSING  
Line broadening 1.0 Hz  
FT size 65536  
Total time 3 hr, 6 min, 43 sec  
Date: Oct 30 2018

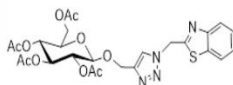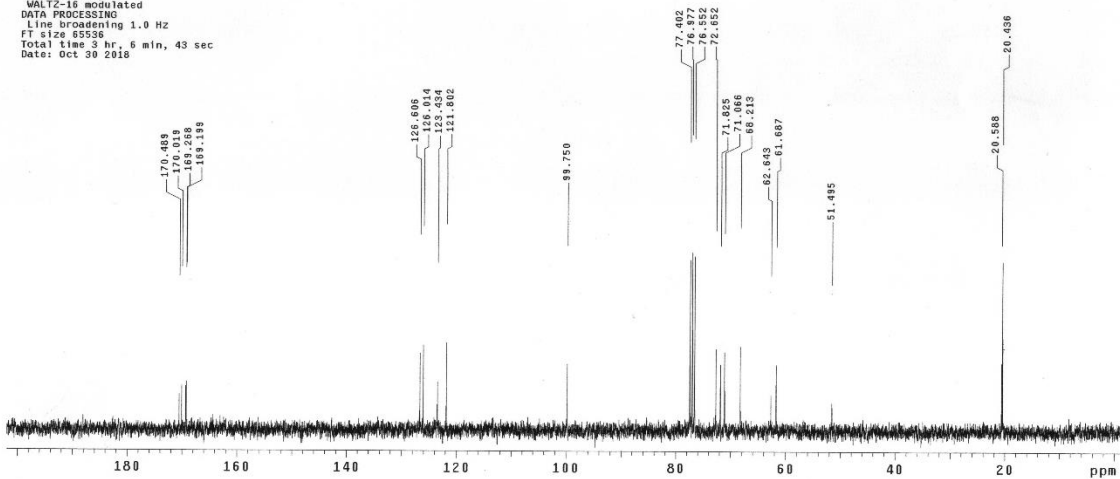

WaelAbdElHafeez-552-CDC13-H1

Archive directory: /export/home/vnmr1/vnmrsys/data  
Sample directory: DD5mm\_test\_12Mar2014-21:34:40  
File: PROTON

Pulse Sequence: s2pul  
Solvent: CDC13  
Temp: 30.0 C / 303.1 K  
Mercury-300MS "NMR300"

Relax. delay 1.000 sec  
Pulse 12.0 degrees  
Acq. time 4.056 sec  
Width 6600.7 Hz  
57 repetitions  
OBSERVE H1, 300.0673634 MHz  
DATA PROCESSING  
Line broadening 0.9 Hz  
FT size 65536  
Total time 38 min, 56 sec  
Date: Nov 26 2017

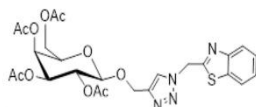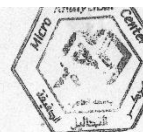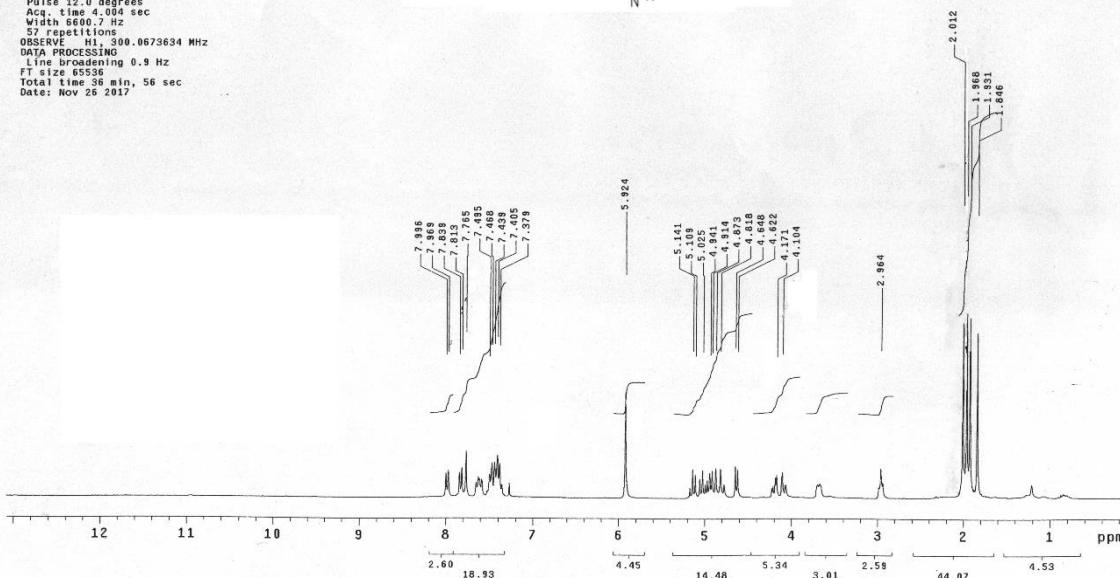

Tarea-S2-CDC12-130

Archive directory: /export/home/vnmr1/vnmrsys/data  
Sample directory: D05mm\_test\_12Mar2014-21:34:40  
File: PROTON

Pulse Sequence: s2pul  
Solvent: CDC13  
Temp: 30.0 C / 303.1 K  
Mercury-300SB "NMR300"

Pulse 67.5 degrees  
Acq. time 1.407 sec  
Width 18761.7 Hz  
2322 repetitions  
OBSERVE C13, 75.4520067 MHz  
DECOUPLE H1, 300.0688576 MHz  
Power 40 dB  
Continuously on  
WALTZ-16 modulated  
DATA PROCESSING  
Line broadening 1.0 Hz  
FT size 65536  
Total time 3 hr, 6 min, 43 sec  
Date: Oct 16 2018

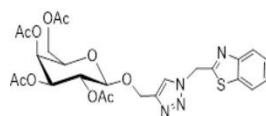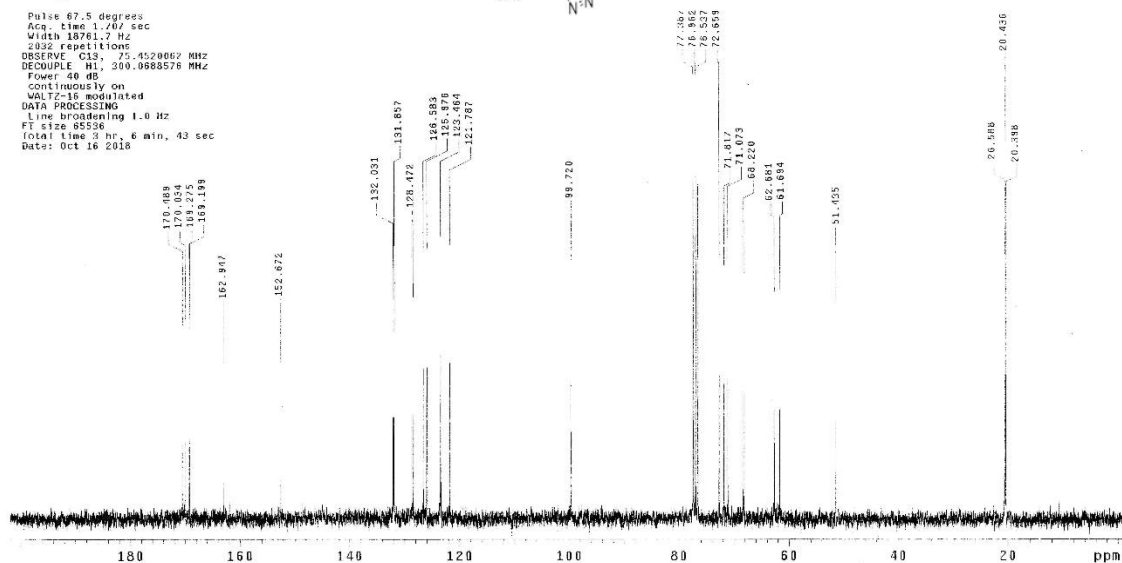

WaelAbdElHafeez-553-CDC13-H1

Archive directory: /export/home/vnmr1/vnmrsys/data  
Sample directory: D05mm\_test\_12Mar2014-21:34:40  
File: PROTON

Pulse Sequence: s2pul  
Solvent: CDC13  
Temp: 30.0 C / 303.1 K  
Mercury-300SB "NMR300"

Relax. delay 1.000 sec  
Pulse 12.0 degrees  
Acq. time 4.984 sec  
Width 6600.7 Hz  
46 repetitions  
OBSERVE H1, 300.0673634 MHz  
DATA PROCESSING  
Line broadening 0.3 Hz  
FT size 65536  
Total time 36 min, 56 sec  
Date: Nov 26 2017

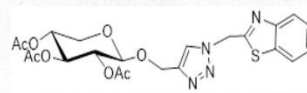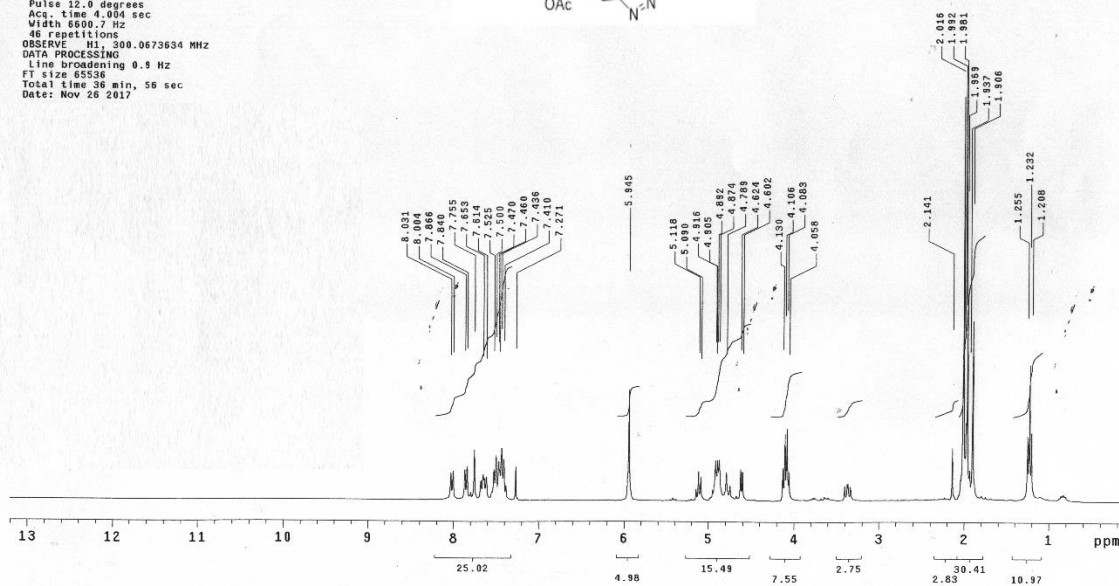

WaelAbdelHafeez-051-CDC13-H1

Archive directory: /export/home/vnmr1/vnmrsys/data  
Sample directory: D05mm\_test\_12Mar2014-21:34:40  
File: PROTON

Pulse Sequence: s2pu1  
Solvent: CDC13  
Temp: 30.0 C / 303.1 K  
Mercury-300BB "NMR300"

Relax. delay 1.000 sec  
Pulse 12.0 degrees  
Acq. time 4.004 sec  
Width 6600.7 Hz  
15 repetitions  
OBSERVE H1, 300.0673634 MHz  
DATA PROCESSING  
Line broadening 0.9 Hz  
FT size 65536  
Total time 36 min, 56 sec  
Date: Nov 26 2017

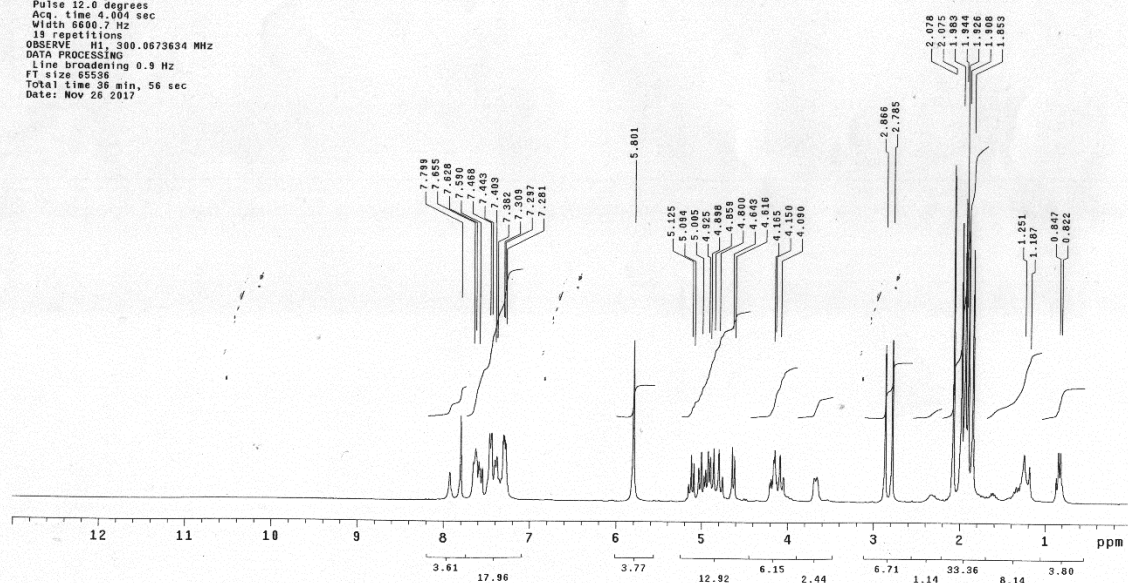

TareqSaad-052-CDC13-1H

Archive directory: /export/home/vnmr1/vnmrsys/data  
Sample directory: D05mm\_test\_12Mar2014-21:34:40  
File: PROTON

Pulse Sequence: s2pu1  
Solvent: CDC13  
Temp: 30.0 C / 303.1 K  
Mercury-300BB "NMR300"

Relax. delay 1.000 sec  
Pulse 12.0 degrees  
Acq. time 4.004 sec  
Width 6600.7 Hz  
43 repetitions  
OBSERVE H1, 300.0673638 MHz  
DATA PROCESSING  
Line broadening 0.9 Hz  
FT size 65536  
Total time 36 min, 56 sec  
Date: Oct 30 2018

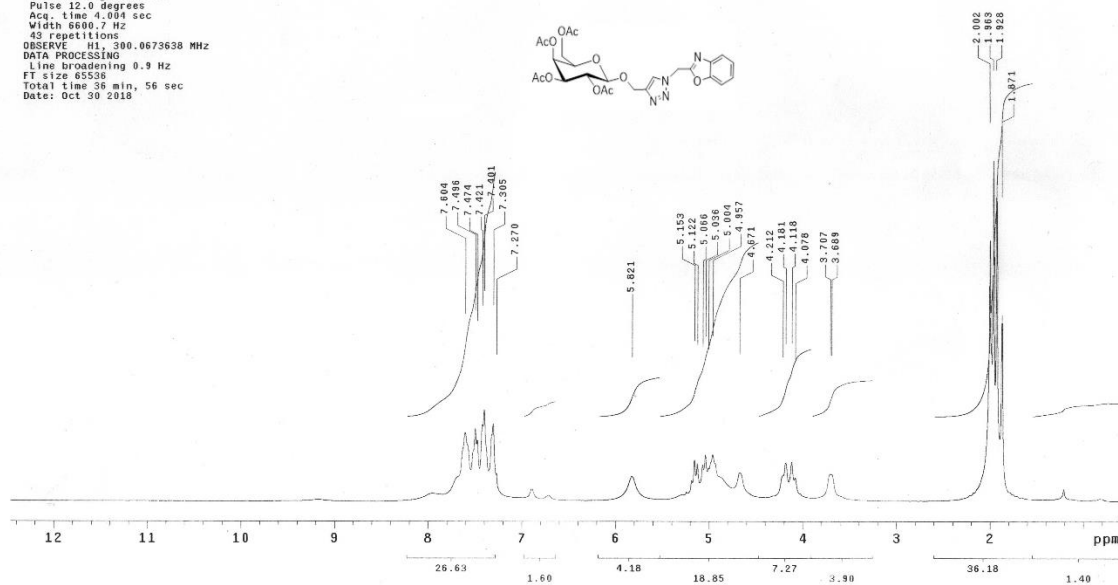

Tarek-052-CDC13-C13

Archive directory: /export/home/vnmr1/vnmrsys/data  
Sample directory: DD5mm\_test\_12Mar2014-21:34:40  
File: PROTON

Pulse Sequence: s2pul

Solvent: CDC13  
Temp: 30.0 C / 303.1 K  
Mercury-300SB "NMR300"

Pulse: 67.5 degrees  
Acq. time 1.797 sec  
Width 10761.7 Hz  
3152 repetitions  
OBSERVE C13, 75.4520952 MHz  
DECOUPLE H1, 300.068576 MHz  
Power 40 dB  
continuously on  
WALTZ-16 modulated  
DATA PROCESSING  
Line broadening 1.0 Hz  
FI size 65536  
Total time 3 hr, 8 min, 43 sec  
Date: Oct 16 2018

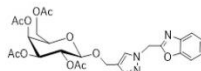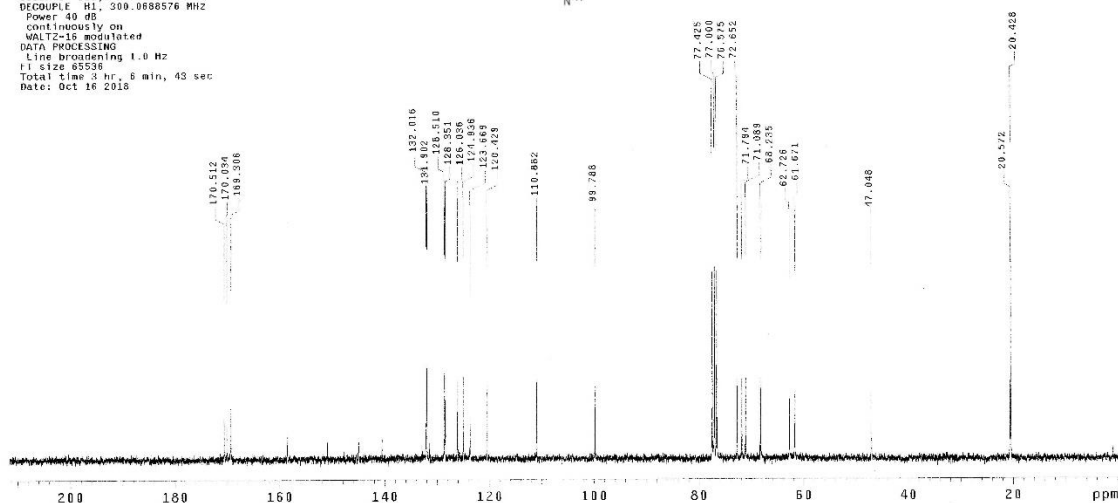

Vae1AbdElHafeez-053-CDC13-H1

Archive directory: /export/home/vnmr1/vnmrsys/data  
Sample directory: DD5mm\_test\_12Mar2014-21:34:40  
File: PROTON

Pulse Sequence: s2pul

Solvent: CDC13  
Temp: 30.0 C / 303.1 K  
Mercury-300SB "NMR300"

Relax. delay 1.000 sec  
Pulse: 12.0 degrees  
Acq. time 4.004 sec  
Width 6600.7 Hz  
35 repetitions  
OBSERVE H1, 300.0673634 MHz  
DATA PROCESSING  
Line broadening 0.9 Hz  
FI size 65536  
Total time 36 min, 56 sec  
Date: Nov 26 2017

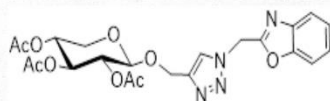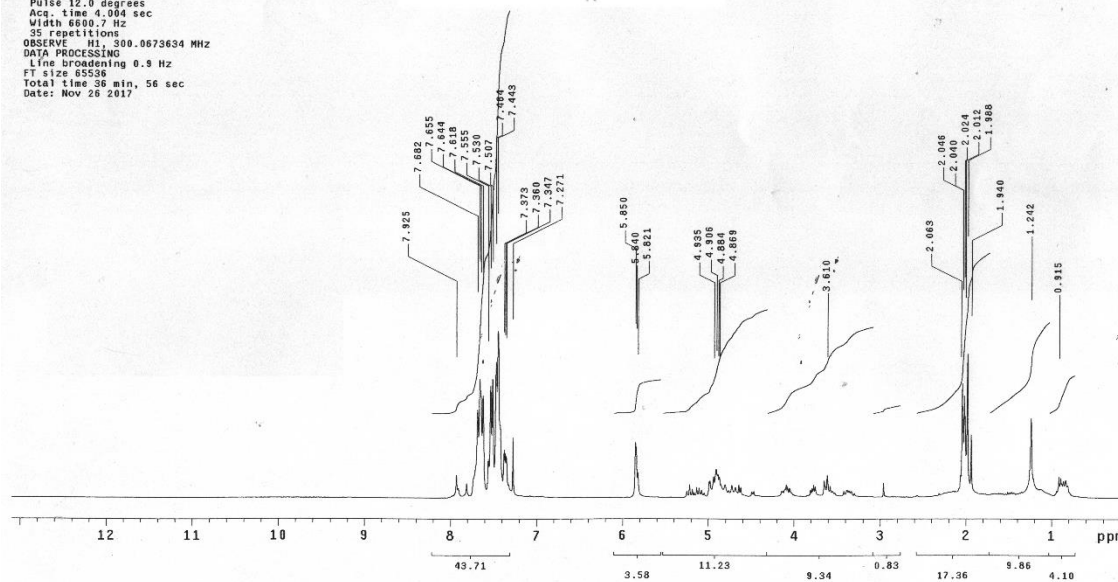

Figure S4 : NMR spectra obtained by using a JEOL EX-500 spectrometer and (CDCl<sub>3</sub>) with TMS as internal standard
